# Supplementary material for: 30-Fold efficiency enhancement achieved in the perovskite light-emitting diodes
Source: Royal Society of Chemistry journal article supplement (doi:10.1039/c7ra09484a), 2017-01-01
Supplement: c7ra09484a1.pdf [file c7ra09484a1.pdf]

## Supporting Information

### **30-Fold Efficiency Enhancement Achieved in the Perovskite Light-Emitting Diodes**

Xing-Juan Ma, Zhi-Qiang Wang, Zi-Yang Xiong, Yue Zhang, Fu-Xing Yu, Ping Chen, Zu-Hong Xiong, and Chun-Hong Gao\*

School of Physical Science and Technology  
MOE key laboratory on Luminescence and Real Time Analysis  
Southwest University  
Chongqing, 400715, China  
E-mail: gch0122@swu.edu.cn

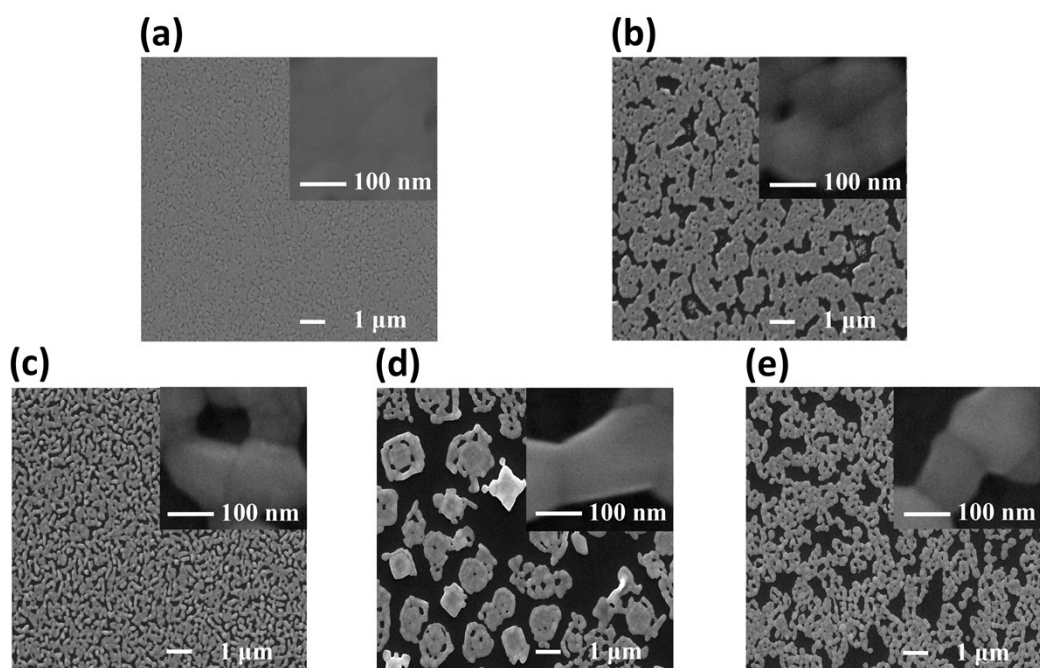

Figure S1. The top-view SEM image of neat CsPbBr<sub>3</sub> films with equimolar PbBr<sub>2</sub>-CsBr at 10 wt% prepared by different post-annealing processes: (a) with only pumping away, (b) with annealing at 70 °C for 5 min after pumping away, (c) with annealing at 70 °C for 30 min after pumping away, (d) with annealing at 70 °C for 60 min after pumping away, and (e) with annealing at 100 °C for 30 min after pumping away. The neat CsPbBr<sub>3</sub> film with only pumping away exhibits higher film coverage and smaller grains than the neat CsPbBr<sub>3</sub> films employing different annealing process after pumping away. And it can be found that the coverage rate decreases and the average grain size increases with the increasing of the annealing time and the

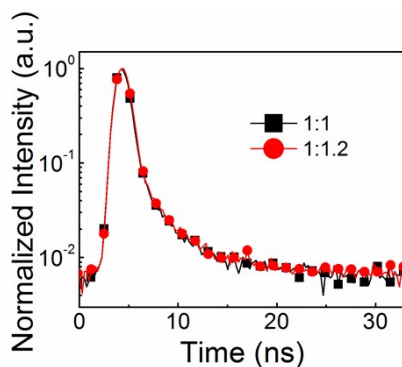

annealing temperature.

Figure S2. The time-resolved PL spectra of neat 1:1 and 1:1.2 CsPbBr<sub>3</sub> films with

just pumping away. The average radiative recombination lifetime of the 1:1.2 neat CsPbBr<sub>3</sub> films (0.86 ns) with only pumping away is larger than 1:1 neat CsPbBr<sub>3</sub> films (0.82 ns).

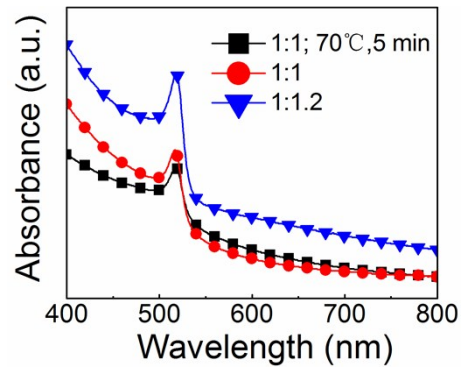

Figure S3. The absorption spectra of three 10 wt% neat CsPbBr<sub>3</sub> films (PbBr<sub>2</sub>:CsBr=1:1 with annealing at 70 °C for 5 min after pumping away, PbBr<sub>2</sub>:CsBr=1:1 with just pumping away, PbBr<sub>2</sub>:CsBr=1:1.2 with just pumping away).
